# Supplementary material
Source: publisher site journal article supplement (https://www.dovepress.com/article/267344)

**Supplementary Figure 1** Data mining of the expression of m6A regulators in leukocyte differentials from Human Protein Atlas (HPA) database. (A-C) Histogram showing RNA-seq data of m6A writer METTL3 (A), METTL14 (B) and WTAP (C) in blood cell type lineages. (D-E) Histogram showing RNA-seq data of m6A eraser ALKBH5 (D) and FTO (E) in blood cell type lineages.


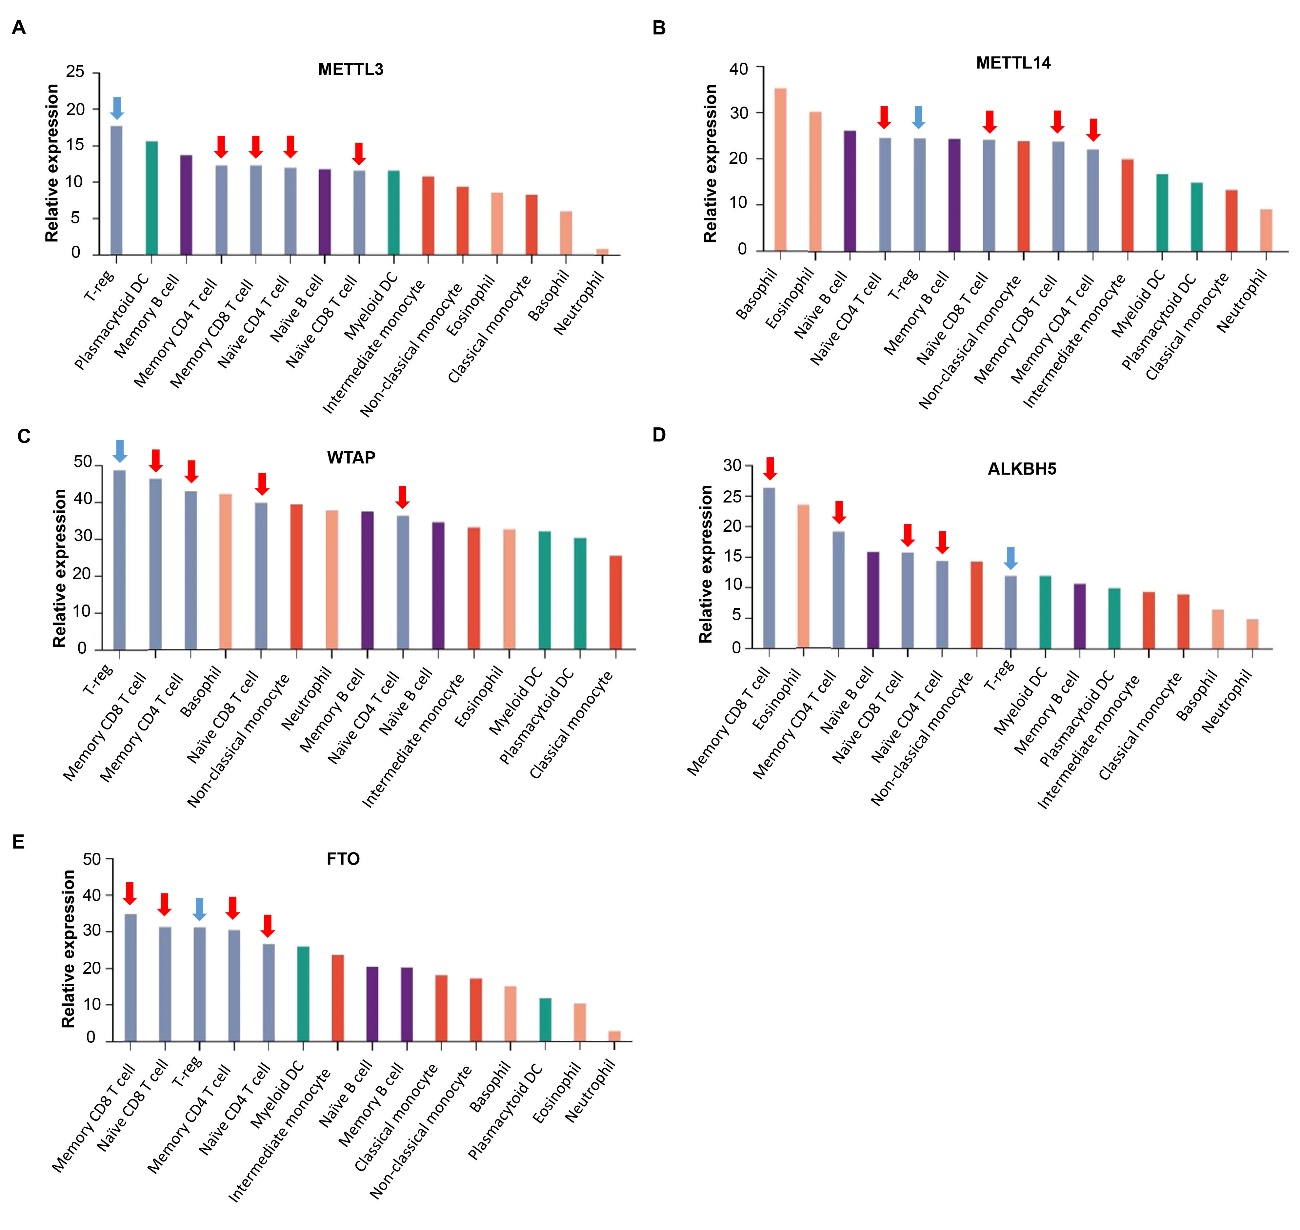

Supplement: Supplementary file 1 [file get_supplementary_file.php]
